# Supplementary material for: A Two-Stage Reconstruction of Microstructures with Arbitrarily Shaped Inclusions
Source: PubMed Central journal article supplement (PMC7345931; doi:10.3390/ma13122748), 2020-06-17
Supplement: materials-13-02748-s001.pdf [file materials-13-02748-s001.pdf]

Supplementary Material

# A Two-Stage Reconstruction of Microstructures with Arbitrarily Shaped Inclusions

Ryszard Piasecki <sup>1,\*</sup>, Wiesław Olchawa <sup>1</sup>, Daniel Frączek <sup>2</sup> and Agnieszka Bartecka <sup>1</sup>

<sup>1</sup> Institute of Physics, University of Opole, Oleska 48, 45-052 Opole, Poland; wolch@uni.opole.pl (W.O.); jazgara@uni.opole.pl (A.B.)

<sup>2</sup> Department of Materials Physics, Opole University of Technology, Katowicka 48, 45-061 Opole, Poland; dfracz@gmail.com

\* Correspondence: piaser@uni.opole.pl

Received: 28 April 2020; Accepted: 13 June 2020; Published: date

**Table S1.** Shape libraries to Example\_1.

| Cluster # | Target                                                                              | Seed 1                                                                              | Seed 2                                                                               | Seed 3                                                                                |
|-----------|-------------------------------------------------------------------------------------|-------------------------------------------------------------------------------------|--------------------------------------------------------------------------------------|---------------------------------------------------------------------------------------|
| 1         |    |    |    |    |
| 2         |  |  |  |  |
| 3         |  |  |  |  |
| 4         |  |  |  |  |
| 5         |  |  |  |  |

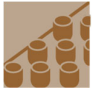

---

| Cluster # | Target | Seed 1 | Seed 2 | Seed 3 |
|-----------|--------|--------|--------|--------|
| 6         |        |        |        |        |
| 7         |        |        |        |        |
| 8         |        |        |        |        |
| 9         |        |        |        |        |
| 10        |        |        |        |        |
| 11        |        |        |        |        |
| 12        |        |        |        |        |

---

| Cluster # | Target                                                                              | Seed 1                                                                              | Seed 2                                                                                | Seed 3                                                                                |
|-----------|-------------------------------------------------------------------------------------|-------------------------------------------------------------------------------------|---------------------------------------------------------------------------------------|---------------------------------------------------------------------------------------|
| 13        |    |    |    |    |
| 14        |    |    |    |    |
| 15        |    |    |    |    |
| 16        |  |  |  |  |
| 17        |  |  |  |  |
| 18        |  |  |  |  |
| 19        |  |  |  |  |

| Cluster # | Target                                                                              | Seed 1                                                                              | Seed 2                                                                                | Seed 3                                                                                |
|-----------|-------------------------------------------------------------------------------------|-------------------------------------------------------------------------------------|---------------------------------------------------------------------------------------|---------------------------------------------------------------------------------------|
| 20        |    |    |    |    |
| 21        |    |    |    |    |
| 22        |    |    |    |    |
| 23        |  |  |  |  |
| 24        |  |  |  |  |
| 25        |  |  |  |  |
| 26        |  |  |  |  |

| Cluster # | Target                                                                              | Seed 1                                                                              | Seed 2                                                                                | Seed 3                                                                                |
|-----------|-------------------------------------------------------------------------------------|-------------------------------------------------------------------------------------|---------------------------------------------------------------------------------------|---------------------------------------------------------------------------------------|
| 27        |    |    |    |    |
| 28        |    |    |    |    |
| 29        |    |    |    |    |
| 30        |  |  |  |  |
| 31        |  |  |  |  |
| 32        |  |  |  |  |
| 33        |  |  |  |  |

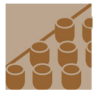

Cluster #

Target

Seed 1

Seed 2

34

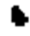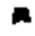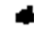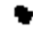

35

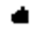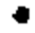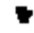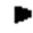

36

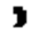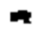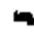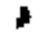

37

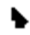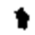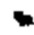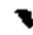

38

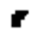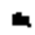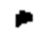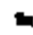

39

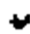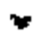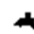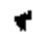

40

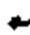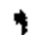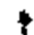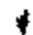

| Cluster # | Target                                                                              | Seed 1                                                                              | Seed 2                                                                                | Seed 3                                                                                |
|-----------|-------------------------------------------------------------------------------------|-------------------------------------------------------------------------------------|---------------------------------------------------------------------------------------|---------------------------------------------------------------------------------------|
| 41        |    |    |    |    |
| 42        |    |    |    |    |
| 43        |    |    |    |    |
| 44        |  |  |  |  |
| 45        |  |  |  |  |
| 46        |  |  |  |  |
| 47        |  |  |  |  |



Cluster #

Target

Seed 1

Seed 2

48

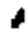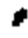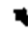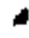

49

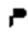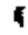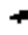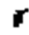

50

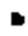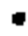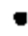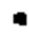

51

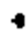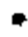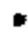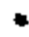

52

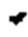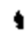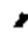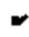

53

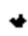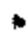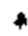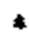

54

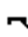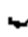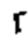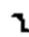



| Cluster # | Target | Seed 1 | Seed 2 | Seed 3 |
|-----------|--------|--------|--------|--------|
| 55        | ↙      | ↘      | ↗      | ↖      |
| 56        | ↖      | ↗      | ↘      | ↙      |
| 57        | ↗      | ↖      | ↙      | ↘      |
| 58        | ↘      | ↙      | ↖      | ↗      |
| 59        | ↖      | ↗      | ↘      | ↙      |
| 60        | ↗      | ↖      | ↙      | ↘      |
| 61        | ↘      | ↙      | ↖      | ↗      |

| Cluster # | Target                                                                              | Seed 1                                                                              | Seed 2                                                                                | Seed 3                                                                                |
|-----------|-------------------------------------------------------------------------------------|-------------------------------------------------------------------------------------|---------------------------------------------------------------------------------------|---------------------------------------------------------------------------------------|
| 62        |    |    |    |    |
| 63        |    |    |    |    |
| 64        |    |    |    |    |
| 65        |  |  |  |  |
| 66        |  |  |  |  |
| 67        |  |  |  |  |
| 68        |  |  |  |  |

| Cluster # | Target | Seed 1 | Seed 2 | Seed 3 |
|-----------|--------|--------|--------|--------|
| 69        | ■      | ■      | ■      | ■      |
| 70        | ■      | ■      | ■      | ■      |
| 71        | ■      | ■      | ■      | ■      |
| 72        | ■      | ■      | ■      | ■      |
| 73        | ■      | ■      | ■      | ■      |
| 74        | ■      | ■      | ■      | ■      |
| 75        | ■      | ■      | ■      | ■      |

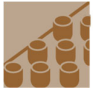

Cluster #

Target

Seed 1

Seed 2

76

■

■

■

■

77

▶

▶

▶

▶

78

▶

▶

▶

▶

79

■

■

■

■

80

▶

▶

▶

▶

81

■

■

■

■

82

■

■

■

■

| Cluster # | Target | Seed 1 | Seed 2 | Seed 3 |
|-----------|--------|--------|--------|--------|
| 83        | -      | ▪      | l      | -      |
| 84        | ▪      | ▪      | ▪      | ▪      |
| 85        | -      | ▪      | ▪      | ▪      |
| 86        | ▪      | ▪      | ▪      | ▪      |
| 87        | ▪      | ▪      | ▪      | ▪      |
| 88        | ▪      | ▪      | ▪      | ▪      |
| 89        | ▪      | ▪      | ▪      | ▪      |

| Cluster # | Target | Seed 1 | Seed 2 | Seed 3 |
|-----------|--------|--------|--------|--------|
| 90        | '      | '      | '      | '      |
| 91        | '      | -      | '      | -      |
| 92        | '      | '      | '      | '      |
| 93        | -      | -      | '      | -      |
| 94        | -      | '      | '      | '      |
| 95        | '      | '      | '      | '      |
| 96        | '      | '      | '      | '      |

| Cluster # | Target | Seed 1 | Seed 2 | Seed 3 |
|-----------|--------|--------|--------|--------|
| 97        | •      | •      | •      | •      |
| 98        | •      | •      | •      | •      |
| 99        | •      | •      | •      | •      |
| 100       | •      | •      | •      | •      |
| 101       | •      | •      | •      | •      |
| 102       | •      | •      | •      | •      |
| 103       | •      | •      | •      | •      |

| Cluster # | Target | Seed 1 | Seed 2 | Seed 3 |
|-----------|--------|--------|--------|--------|
| 104       | .      | .      | .      | .      |
| 105       | .      | .      | .      | .      |
| 106       | .      | .      | .      | .      |
| 107       | .      | .      | .      | .      |
| 108       | .      | .      | .      | .      |
| 109       | .      | .      | .      | .      |
| 110       | .      | .      | .      | .      |



| Cluster # | Target | Seed 1 | Seed 2 | Seed 3 |
|-----------|--------|--------|--------|--------|
| 111       | .      | .      | .      | .      |
| 112       | .      | .      | .      | .      |
| 113       | -      | -      | .      | -      |

---

Table S2. Shape libraries to Example\_2.

| Cluster # | Target                                                                              | Seed 1                                                                              | Seed 2                                                                               | Seed 3                                                                                |
|-----------|-------------------------------------------------------------------------------------|-------------------------------------------------------------------------------------|--------------------------------------------------------------------------------------|---------------------------------------------------------------------------------------|
| 1         |    |    |    |    |
| 2         |    |    |    |    |
| 3         |    |    |    |    |
| 4         |  |  |  |  |
| 5         |  |  |  |  |



| Cluster # | Target | Seed 1 | Seed 2 | Seed 3 |
|-----------|--------|--------|--------|--------|
| 6         |        |        |        |        |
| 7         |        |        |        |        |
| 8         |        |        |        |        |
| 9         |        |        |        |        |
| 10        |        |        |        |        |
| 11        |        |        |        |        |
| 12        |        |        |        |        |



| Cluster # | Target | Seed 1 | Seed 2 | Seed 3 |
|-----------|--------|--------|--------|--------|
| 13        |        |        |        |        |
| 14        |        |        |        |        |
| 15        |        |        |        |        |
| 16        |        |        |        |        |
| 17        |        |        |        |        |
| 18        |        |        |        |        |
| 19        |        |        |        |        |

| Cluster # | Target                                                                              | Seed 1                                                                              | Seed 2                                                                                | Seed 3                                                                                |
|-----------|-------------------------------------------------------------------------------------|-------------------------------------------------------------------------------------|---------------------------------------------------------------------------------------|---------------------------------------------------------------------------------------|
| 20        |    |    |    |    |
| 21        |    |    |    |    |
| 22        |    |    |    |    |
| 23        |  |  |  |  |
| 24        |  |  |  |  |
| 25        |  |  |  |  |
| 26        |  |  |  |  |

| Cluster # | Target                                                                              | Seed 1                                                                              | Seed 2                                                                                | Seed 3                                                                                |
|-----------|-------------------------------------------------------------------------------------|-------------------------------------------------------------------------------------|---------------------------------------------------------------------------------------|---------------------------------------------------------------------------------------|
| 27        |    |    |    |    |
| 28        |    |    |    |    |
| 29        |    |    |    |    |
| 30        |   |   |   |   |
| 31        |  |  |  |  |
| 32        |  |  |  |  |
| 33        |  |  |  |  |

| Cluster # | Target                                                                              | Seed 1                                                                              | Seed 2                                                                                | Seed 3                                                                                |
|-----------|-------------------------------------------------------------------------------------|-------------------------------------------------------------------------------------|---------------------------------------------------------------------------------------|---------------------------------------------------------------------------------------|
| 34        |    |    |    |    |
| 35        |    |    |    |    |
| 36        |    |    |    |    |
| 37        |  |  |  |   |
| 38        |  |  |  |  |
| 39        |  |  |  |  |
| 40        |  |  |  |  |

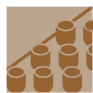

Cluster #

Target

Seed 1

Seed 2

Seed 3

41

42

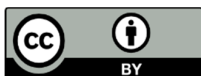

© 2019 by the authors. Submitted for possible open access publication under the terms and conditions of the Creative Commons Attribution (CC BY) license (<http://creativecommons.org/licenses/by/4.0/>).
